# Supplementary material for: Biochemical and Enzymatic Analyses to Understand the Accumulation of γ-Aminobutyric Acid in Wheat Grown under Flooding Stress
Source: MDPI journal article supplement (doi:10.3390/oxygen3010009), 2023-03-01
Supplement: s1 [file s1]

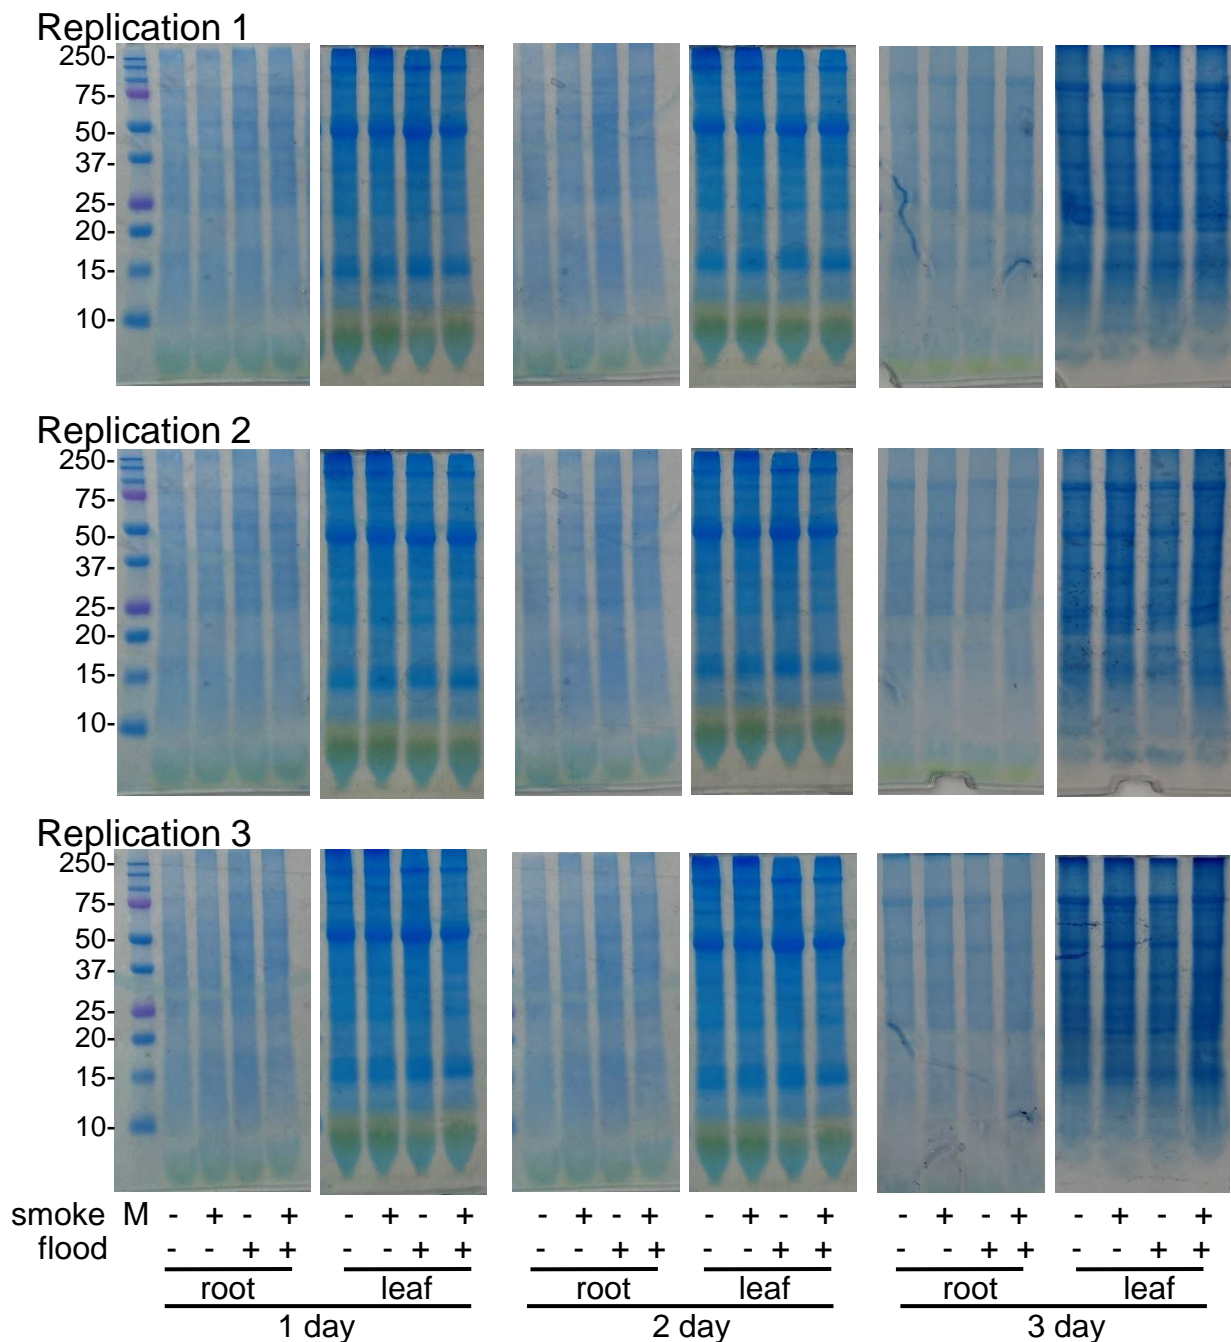

Figure S1. The Coomassie-brilliant blue staining patterns of proteins used for immunoblot analysis. Experiments were performed with biologically triplicates for each treatment for 1, 2, and 3 days. Quantified proteins (10  $\mu$ g) from root and leaf treated with plant-derived smoke solution under flooding stress were separated by electrophoresis on a 10% SDS-polyacrylamide gel. Coomassie-brilliant blue staining was used as a loading control. M means marker proteins (kDa)

## Replication 1

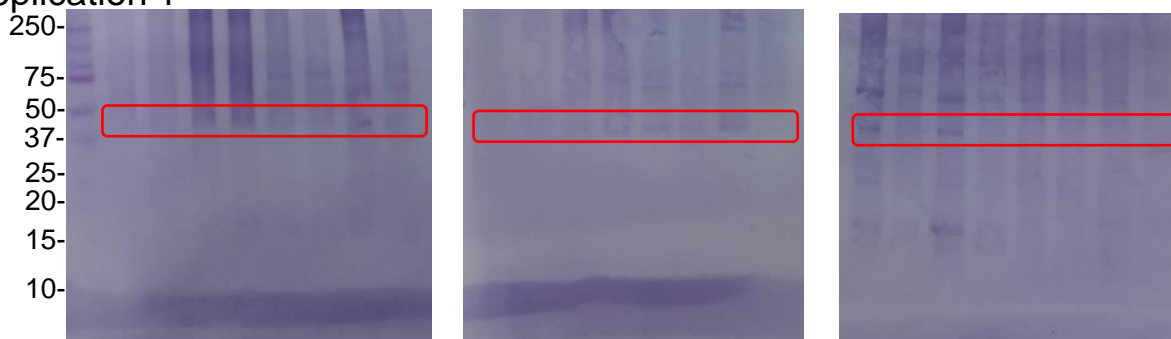

## Replication 2

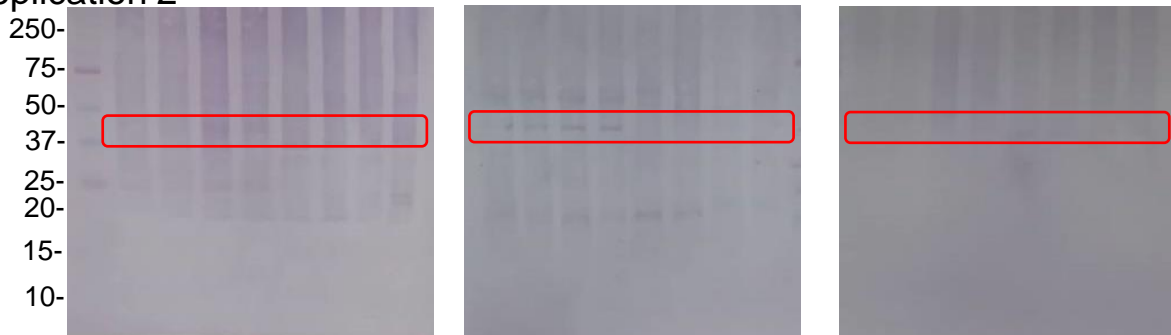

### Replication 3

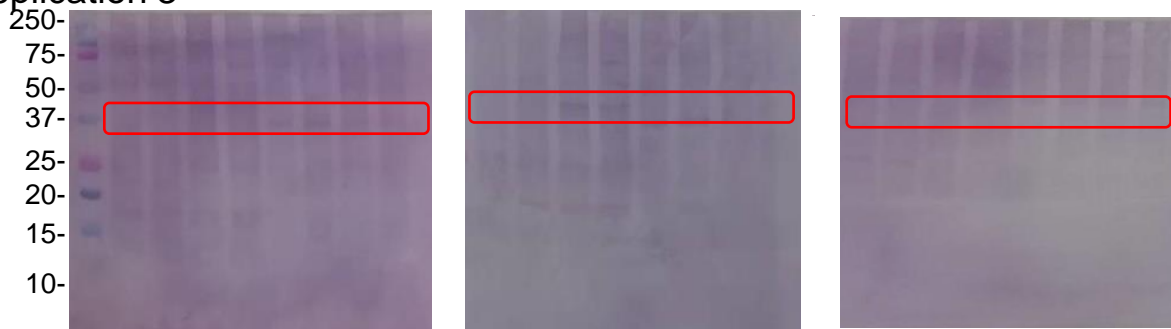

|       |   |             |   |   |   |             |   |   |   |             |   |   |   |             |   |   |   |             |   |   |   |             |  |  |  |
|-------|---|-------------|---|---|---|-------------|---|---|---|-------------|---|---|---|-------------|---|---|---|-------------|---|---|---|-------------|--|--|--|
| smoke | M | -           | + | - | + | -           | + | - | + | -           | + | - | + | -           | + | - | + | -           | + | - | + |             |  |  |  |
| flood |   | -           | - | + | + | -           | - | + | + | -           | - | + | + | -           | - | + | + | -           | - | + | + |             |  |  |  |
|       |   | <u>root</u> |   |   |   | <u>leaf</u> |   |   |   | <u>root</u> |   |   |   | <u>leaf</u> |   |   |   | <u>root</u> |   |   |   | <u>leaf</u> |  |  |  |
|       |   | 1 day       |   |   |   |             |   |   |   | 2 day       |   |   |   |             |   |   |   | 3 day       |   |   |   |             |  |  |  |

Figure S2. Blots of the entire membrane with ADH antibody, which are used in Figure 2. “M” means marker proteins.
